# Supplementary material for: Selenium and the risk of cardiovascular disease and all-cause mortality: a meta-analysis of prospective observational studies and randomized controlled trials
Source: Research Square preprint supplement (doi:10.21203/rs.3.rs-358602/v1), 2021-04-08
Supplement: Supplementary file 1 [file 6c6d6286ad0c3fcfd394d335.docx]

Table S1. Summary of the characteristics of the prospective observational studies

| First author, year | Country | Source | Sex | Age (years) | Follow-up (years) | Exposed（μg/L) | Reference (μg/L) | Outcomes | Assessment | Quality |
| --- | --- | --- | --- | --- | --- | --- | --- | --- | --- | --- |
| Salonen,1982 | Finland | Eastern Finland Heart survey | M/F | 35-59 | 7 | ≥45 | < 45 | CVD mortality (283/283 ),CHD mortality (95/95)，MI mortality(252/252) | AAS(serum) | 9 |
| Miettinen,1983 | Finland | Eastern Finland Heart survey | M | 48 | 5-7 | ≥82.6 | < 63.2 | MI incidece (33/64) | AAS(serum) | 6 |
| Salonen,1985 | Finland | Eastern Finland Heart survey | M/F | 30-64 | 5 | ≥45 | < 45 | CHD mortality (92/92) | AAS(serum) | 8 |
| Virtamo,1985 | Finland | National Death Certificate Register | M | 55-74 | 5 | ≥45 | < 45 | CVD mortality (42/579),CHD mortality (30/591), MI mortality (45/566),Total deaths (74/547) | AAS(serum) | 8 |
| Ringstad,1986 | Norway | The First The Troms Ø Heart Study | M | 20-49 | 8 | ≥98.7 | < 98.7 | MI incidece (99/99) | AAS(serum) | 7 |
| Kok,1987 | Netherlands | Epidemiologic Prevention Study Zoetermeer | M/F | 37-87 | 9 | ≥105.4 | <105.4 | CVD mortality (84/168),CHD mortality (56/168),stroke(15/168) | NAA(serum) | 9 |
| Ringstad,1987 | Norway | The Second The Troms Ø Heart Study | M | 28-54 | 6 | ≥114.5 | <114.5 | MI incidece (59/59) | AAS(serum) | 7 |
| Suadicani,1992 | Denmark | The Copenhagen Male Study | M | 53-74 | 3 | >78.96 | ≤78.96 | CHD incidence (107/2715) | AAS(serum) | 7 |
| Salvini,1995 | USA | The Physicians' Health Study | M | 40-84 | 5 | >133.5 | <92.5 | MI incidece (186/186) | NAA(serum) | 8 |
| Marniemi,1998 | Finland | Health survey with complete clinical evaluation | M/F | ≥65 | 13 | >89.6 | <68.2 | CVD mortality (142/202) | AAS(serum) | 8 |
| Kilander,2001 | Sweden | The Uppsala health survery | M | 49-51 | 25 | 1sd | 1sd | CVD mortality (301/1727),Total deaths (630/1398) | AAS(serum) | 7 |
| Yoshizawa,2003 | USA | The Health Professionals Follow-up Study | M | 40-75 | 5 | ≥105.4 | <105.4 | CHD incidence (470/465),MI incidence (225/465) | NAA(toenails) | 8 |
| Wei,2004 | China | The Nutrition Intervention Trial in Linxian | M/F | 40-69 | 15 | >94 | ≤60.8 | CHD mortality (116/987),stroke(167/936),Total deaths (516/587) | AAS(serum) | 9 |

Table S1. Summary of the characteristics of the prospective observational studies

| Akbaraly,2005 | France | Etide du Vieillissement Arteriel | M/F | 59-71 | 9 | ≥96.3 | <75.8 | CVD mortality (22/1367),Total deaths (101/1288) | AAS(serum) | 8 |
| --- | --- | --- | --- | --- | --- | --- | --- | --- | --- | --- |
| Ray,2006 | US | The Women's Health and Agingstduies I and II in Baltimore, MD | F | 70-79 | 5 | 1sd | 1sd | Total deaths (89/543) | AAS(serum) | 6 |
| Walston,2006 | US | The Women's Health and Aging stduies I in Baltimore, MD | F | ≥65 | 5 | >122.8 | ≤109.9 | Total deaths (197/422) | AAS(serum) | 8 |
| Gonzalez,2007 | Spain | Recruited in fourteen elderly care institutions from Asturius | M/F | ≥60 | 4.3 | >99.5 | ≤72.6 | Total deaths (60/155) | AAS(serum) | 7 |
| Bleys,2008 | USA | The Third National Health and Nutrition Examination Survey | M/F | 20-90 | 12 | ≥130.39 | <117.31 | CVD mortality (881/13006),CHD mortality (390/13497),stroke(138/13749)Total deaths (1968/11919) | AAS(serum) | 9 |
| Lauretani,2008 | Italy | "Aging in the chianti Area" study | M/F | ≥65 | 6 | >81.9 | <66.2 | Total deaths (237/805) | AAS(plasma) | 8 |
| Eaton,2010 | USA | The Third National Health and Nutrition Examination Survey | M/F | ≥35 | 13.4 | >98 | ≤98 | CHD mortality (1038/9493),Total deaths (3944/6587) | AAS(serum) | 8 |
| Bates,2011 | British | The British National Diet and Nutrition Survery | M/F | ≥65 | 13 | 1sd | 1sd | CVD mortality (189/865),Total deaths (717/337) | ICP-MS（plasma) | 7 |
| Wennberg,2011 | Sweden | The Northern Sweden Health and Disease Study | M | 30-77 | 13 | >134.5 | <117 | MI incidece (431/499) | ICP-MS (erythrocyte) | 8 |
| Suadicani,2012 | Denmark | The Copenhagen Male Study | M | 53-74 | 16 | ≥102.65 | ≤78.96 | Total deaths (1428/1905) | AAS(serum) | 7 |
| Goyal,2013 | USA | The Third National Health and Nutrition Examination Survey | M/F | 20-90 | 14.2 | ≥136.6 | ≤109 | CVD mortality (1891/14117),Total deaths (4225/11783) | AAS(serum) | 8 |
| Alehagen,2016 | Sweden | The National Board of Health and Welfare in Sweden | M/F | 70-80 | 6.8 | >76.1 | <57.2 | CVD mortality (85/449),Total deaths (122/327) | ICP-MS（serum) | 6 |

CVD cardiovascular disease, CHD coronary heart disease, MI [myocardial infarction](file:///G:\%E5%B8%B8%E7%94%A8%E5%A8%B1%E4%B9%90%E8%BD%AF%E4%BB%B6\tudou\Youdao\Dict\7.2.0.0511\resultui\dict\?keyword=myocardial%20infarction&lang=en)

Table S2. Summary of the characteristics of the randomized controlled trials

| Author, year | Country | Sex | Age (years) | Follow-up (years) | Dose ( μg/d) | Selenium combination | Outcomes | cases/controls | Quality |
| --- | --- | --- | --- | --- | --- | --- | --- | --- | --- |
| Korpela,1989 | Finland | M/F | 57 | 0.5 | 100 | NO | CHD mortality | Placebo:6/41 Treatment:1/40 | 2 |
| Kuklinski,1994 | Germany | NR | 61.5 | 1 | 100 | Coenzyme | MI mortality | Placebo:6/29 Treatment:0/32 | 2 |
| Brown,2001 | Canada and USA | M/F | 53 | 3 | 100 | Vitamin E; vitamin C; β-carotene | CVD mortality MI mortality | Placebo:8/76 Treatment:6/84 | 5 |
| You,2001 | China | M/F | 47 | 3.3 | 75 | garlic, garlic oil, vitamin C, vitamin E, β-carotene | CVD mortality Total death | Placebo:12/1705,43/1705 Treatment:9/1706 ,38/1706 | 5 |
| Hercberg,2004 | France | M/F | 48 | 7.5 | 100 | Vitamin C, vitamin E, β-carotene, and Zn | CHD incidence Total death | Placebo:137/6377,98/6377 Treatment:134/6364,76/6364 | 5 |
| Stranges,2006 | USA | M/F | 62 | 7.6 | 200 | NO | CVD mortality, CHD mortality, MI mortality Total death | Placebo:96,59,43,111/500 Treatment:103,63,41,110/504 | 5 |
| Klein,2011 | USA, Canada, Puerto Rico | M | 62.6 | 8.46 | 200 | NO | CVD mortality Total death | Placebo:969/8696,939/8696 Treatment:564/8752,551/8752 | 5 |
| Lamas,2013 | USA and Canada | M/F | 65 | 4.6 | 200 | multi-vitamins | CVD mortality Total death | Placebo:56/855,93/855 Treatment:45/853,87/853 | 5 |
| Alehagen,2015 | Sweden | M/F | 78 | 10 | 200 | Coenzyme | CVD mortality Total death | Placebo:86/222,120/222 Treatment:46/221,98/221 | 5 |

CVD cardiovascular disease, CHD coronary heart disease, MI [myocardial infarction](file:///G:\%E5%B8%B8%E7%94%A8%E5%A8%B1%E4%B9%90%E8%BD%AF%E4%BB%B6\tudou\Youdao\Dict\7.2.0.0511\resultui\dict\?keyword=myocardial%20infarction&lang=en)
